# Supplementary material
Source: MDPI journal article supplement (https://www.mdpi.com/2073-4395/14/5/1056)
Supplement: s1 [file s1]

**Table S1.** Two-way ANOVA test of soil microbial biomass carbon (MBC) at low and high temperatures under NF, CK, WS, and NPK treatments

|                       | F value | p       |
|-----------------------|---------|---------|
| Treatment             | 34.65   | <0.0001 |
| Temperature           | 39.35   | <0.0001 |
| Treatment*Temperature | 3.29    | 0.03    |

**Table S2.** Beta diversity of soil bacterial and fungal communities under CK, NF, WS, and NPK treatments under low (LT) and high (HT) temperatures based on the Aitchison distance.

|          | Temperature/<br>Treatment | Beta<br>diversity | A value | Observed delta | Expected<br>delta | P       |
|----------|---------------------------|-------------------|---------|----------------|-------------------|---------|
| Bacteria | LT                        | CK vs NF          | 0.00    | 362.75         | 363.61            | 0.13    |
|          |                           | CK vs WS          | 0.00    | 360.24         | 360.74            | 0.75    |
|          |                           | CK vs NPK         | 0.00    | 362.89         | 363.20            | 0.64    |
|          |                           | NF vs WS          | 0.01    | 363.32         | 366.00            | 0.06    |
|          |                           | NF vs NPK         | 0.00    | 365.78         | 367.49            | 0.08    |
|          |                           | WS vs NPK         | 0.00    | 362.48         | 363.76            | 0.98    |
|          | HT                        | CK vs NF          | 0.02    | 348.19         | 355.55            | <0.01** |
|          |                           | CK vs WS          | 0.04    | 329.48         | 341.56            | <0.01** |
|          |                           | CK vs NPK         | 0.04    | 329.16         | 342.11            | <0.01** |
|          |                           | NF vs WS          | 0.06    | 339.80         | 361.18            | <0.01** |
|          |                           | NF vs NPK         | 0.06    | 339.47         | 360.14            | <0.01** |
|          |                           | WS vs NPK         | 0.00    | 320.76         | 321.65            | 0.05*   |
|          | CK                        | LT vs HT          | 0.03    | 349.03         | 359.60            | <0.01** |
|          | NF                        | LT vs HT          | 0.03    | 361.92         | 372.37            | <0.01** |
|          | WS                        | LT vs HT          | 0.05    | 341.19         | 359.80            | <0.01** |
|          | NPK                       | LT vs HT          | 0.05    | 343.33         | 361.71            | <0.01** |
|          |                           | CK vs NF          | 0.01    | 314.11         | 315.72            | 0.19    |
|          |                           | CK vs WS          | 0.02    | 290.25         | 296.93            | 0.01*   |

|       |     |           |      |        |        |         |
|-------|-----|-----------|------|--------|--------|---------|
| Fungi | LT  | CK vs NPK | 0.02 | 299.38 | 305.00 | 0.09    |
|       |     | NF vs WS  | 0.04 | 294.74 | 308.41 | <0.01** |
|       |     | NF vs NPK | 0.03 | 303.88 | 312.93 | 0.02*   |
|       |     | WS vs NPK | 0.01 | 280.01 | 282.63 | 0.01*   |
|       |     | CK vs NF  | 0.02 | 313.77 | 319.90 | 0.02*   |
|       |     | CK vs WS  | 0.01 | 302.40 | 306.75 | 0.02*   |
|       | HT  | CK vs NPK | 0.02 | 299.79 | 306.95 | <0.01** |
|       |     | NF vs WS  | 0.04 | 309.81 | 321.47 | 0.01*   |
|       |     | NF vs NPK | 0.04 | 307.20 | 320.46 | <0.01** |
|       |     | WS vs NPK | 0.00 | 295.82 | 294.92 | 0.51    |
|       | CK  | LT vs HT  | 0.00 | 307.29 | 307.99 | 0.43    |
|       | NF  | LT vs HT  | 0.01 | 319.90 | 322.28 | 0.25    |
|       | WS  | LT vs HT  | 0.01 | 284.66 | 286.68 | 0.05*   |
|       | NPK | LT vs HT  | 0.01 | 291.18 | 293.24 | 0.20    |

**Table S3.** Two-way ANOVA for soil bacterial and fungal community composition under NF, WS, NPK, and CK treatments

|                     | Treatment |           | Temperature |           | Treatment*Temperature |           |
|---------------------|-----------|-----------|-------------|-----------|-----------------------|-----------|
|                     | F value   | p         | F value     | p         | F value               | p         |
| Betaproteobacteria  | 0.93      | 0.43      | 11.25       | <0.01**   | 1.09                  | 0.36      |
| Gammaproteobacteria | 13.52     | <0.001*** | 8.76        | <0.01**   | 1.82                  | 0.16      |
| Actinobacteria      | 6.17      | <0.01**   | 1.11        | 0.30      | 2.06                  | 0.12      |
| Bacteroidetes       | 1.18      | 0.32      | 0.90        | 0.35      | 0.50                  | 0.69      |
| Gemmatimonadetes    | 15.06     | <0.001*** | 6.87        | <0.05     | 4.17                  | <0.05*    |
| Firmicutes          | 0.43      | 0.74      | 85.99       | <0.001*** | 1.67                  | 0.19      |
| Alphaproteobacteria | 19.74     | <0.001*** | 28.47       | <0.001*** | 3.84                  | <0.05*    |
| Deltaproteobacteria | 25.21     | <0.001*** | 14.34       | <0.001*** | 6.99                  | <0.001*** |
| Acidobacteria       | 8.10      | <0.001*** | 3.94        | 0.06      | 1.09                  | 0.36      |
| Chloroflexi         | 21.63     | <0.001*** | 7.87        | <0.01**   | 6.40                  | <0.01**   |
| Verrucomicrobia     | 3.85      | <0.05*    | 2.37        | 0.13      | 0.60                  | 0.62      |
| Ascomycota          | 1.62      | 0.20      | 3.17        | 0.08      | 6.67                  | <0.001*** |
| Zygomycota          | 5.86      | <0.01**   | 3.51        | 0.07      | 4.49                  | <0.01**   |
| Basidiomycota       | 3.49      | <0.05*    | 1.16        | 0.29      | 2.91                  | <0.05*    |

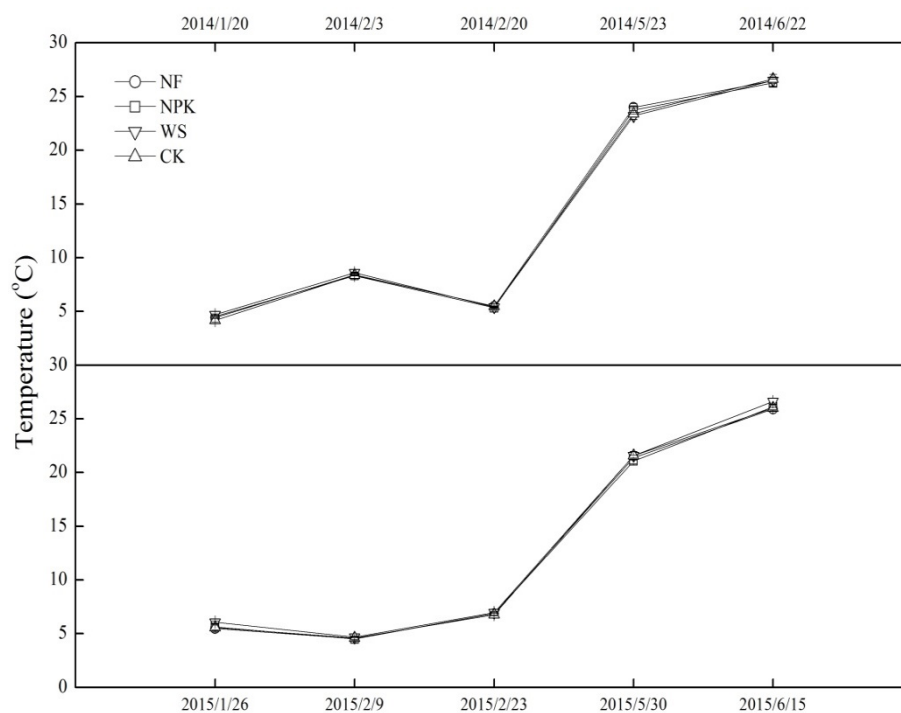

**Figure S1.** Soil temperature in 2014 and 2015 under the NF, NPK, WS, and CK treatments.

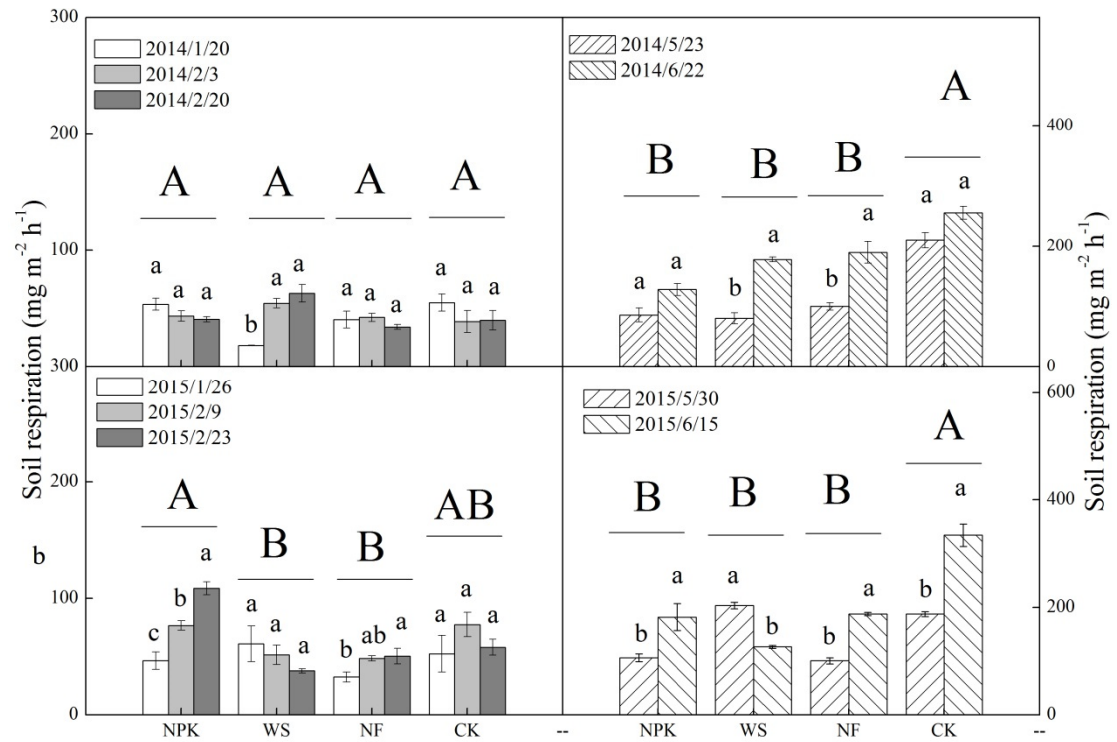

**Figure S2.** Soil respiration ( $\text{mg m}^{-2} \text{h}^{-1}$ ) in 2014 and 2015 under the NF, NPK, WS, and CK treatments. The different lowercase letters indicate significant differences between months for each treatment, and the different uppercase letters represent significant differences between treatments.

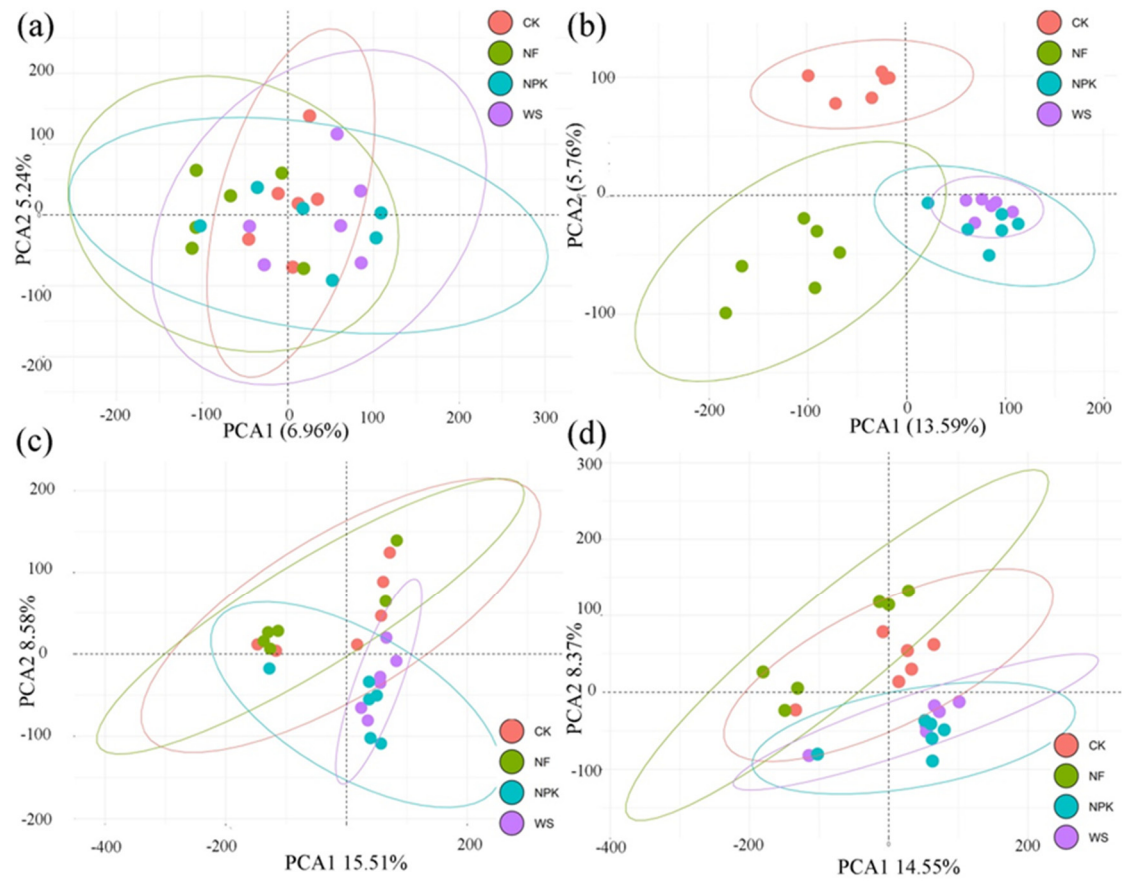

**Figure S3.** Principal component analysis (PCA) for soil microbial diversity: (a and b) soil bacterial diversity, (c and d) soil fungal diversity, (a and c) soil microbial diversity at low temperatures, (b and d) soil microbial diversity at high temperatures.
